# Supplementary material for: Intracoronary Administration of Microencapsulated HGF in a Reperfused Myocardial Infarction Swine Model
Source: MDPI journal article supplement (doi:10.3390/jcdd10020086), 2023-02-17
Supplement: s1 [file s1]

## **Supplementary material**

**Table S1: Individual TnI data.** The table presents the individual TnI data of each group of the study.

| Animal_ID | Group | Time | TnI   |
|-----------|-------|------|-------|
| P16-361   | SAL   | 1    | 0.01  |
| P16-747   | SAL   | 1    | 0.01  |
| P16-744   | SAL   | 1    | 0.03  |
| P17-015   | SAL   | 1    | 0.02  |
| P17-359   | SAL   | 1    | 0.013 |
| P17-360   | SAL   | 1    | 0.01  |
| P17-369   | SAL   | 1    | 0.01  |
| P16-361   | SAL   | 2    | 8.70  |
| P16-747   | SAL   | 2    | 5.6   |
| P16-744   | SAL   | 2    | 18.00 |
| P17-015   | SAL   | 2    | 2.20  |
| P17-359   | SAL   | 2    | 6.6   |
| P17-360   | SAL   | 2    | 5.5   |
| P17-369   | SAL   | 2    | 17    |
| P16-361   | SAL   | 3    | 4.50  |
| P16-747   | SAL   | 3    | 7     |
| P16-744   | SAL   | 3    | 15    |
| P17-015   | SAL   | 3    | 6.10  |
| P17-359   | SAL   | 3    | 23    |
| P17-360   | SAL   | 3    | 12    |
| P17-369   | SAL   | 3    | 14    |
| P16-361   | SAL   | 4    | 3.80  |
| P16-747   | SAL   | 4    | 7.7   |
| P16-744   | SAL   | 4    | 16.00 |
| P17-015   | SAL   | 4    | 5.50  |
| P17-359   | SAL   | 4    | 17    |
| P17-360   | SAL   | 4    | 11    |
| P17-369   | SAL   | 4    | 13    |
| P16-361   | SAL   | 5    | 2     |
| P16-747   | SAL   | 5    | 6.5   |
| P16-744   | SAL   | 5    | 11    |
| P17-015   | SAL   | 5    | 1.10  |
| P17-359   | SAL   | 5    | 12    |
| P17-360   | SAL   | 5    | 8.6   |
| P17-369   | SAL   | 5    | 7.8   |
| P16-361   | SAL   | 6    | 0.02  |
| P16-747   | SAL   | 6    | 0.025 |
| P16-744   | SAL   | 6    | 0.69  |
| P17-015   | SAL   | 6    | 0.09  |

|         |     |   |       |
|---------|-----|---|-------|
| P17-359 | SAL | 6 | 0.31  |
| P17-360 | SAL | 6 | 0.095 |
| P17-369 | SAL | 6 | 0.066 |
| P16-361 | SAL | 7 | 0.01  |
| P16-747 | SAL | 7 | 0.01  |
| P16-744 | SAL | 7 | 0.01  |
| P17-015 | SAL | 7 | 0.01  |
| P17-359 | SAL | 7 | 0.021 |
| P17-360 | SAL | 7 | 0.01  |
| P17-369 | SAL | 7 | 0.01  |
| P17-018 | MS  | 1 | 0.02  |
| P17-017 | MS  | 1 | 0.10  |
| P17-060 | MS  | 1 | 0.03  |
| P17-058 | MS  | 1 | 0,03  |
| P17-044 | MS  | 1 | 0.01  |
| P17-043 | MS  | 1 | 0.01  |
| P17-046 | MS  | 1 | 0.01  |
| P17-018 | MS  | 2 | 34    |
| P17-017 | MS  | 2 | 13    |
| P17-060 | MS  | 2 | 8     |
| P17-058 | MS  | 2 | 2.80  |
| P17-044 | MS  | 2 | 5.20  |
| P17-043 | MS  | 2 | 3.70  |
| P17-046 | MS  | 2 | 20    |
| P17-018 | MS  | 3 | 9.50  |
| P17-017 | MS  | 3 | 11    |
| P17-060 | MS  | 3 | 8.10  |
| P17-058 | MS  | 3 | 3.50  |
| P17-044 | MS  | 3 | 14.00 |
| P17-043 | MS  | 3 | 3,70  |
| P17-046 | MS  | 3 | 41    |
| P17-018 | MS  | 4 | 8.90  |
| P17-017 | MS  | 4 | 9.60  |
| P17-060 | MS  | 4 | 8.50  |
| P17-058 | MS  | 4 | 3.40  |
| P17-044 | MS  | 4 | 14.00 |
| P17-043 | MS  | 4 | 3.50  |
| P17-046 | MS  | 4 |       |
| P17-018 | MS  | 5 | 5.70  |
| P17-017 | MS  | 5 | 6.80  |
| P17-060 | MS  | 5 | 6     |
| P17-058 | MS  | 5 | 1.70  |
| P17-044 | MS  | 5 | 0.26  |
| P17-043 | MS  | 5 | 1.10  |
| P17-046 | MS  | 5 |       |

|         |        |   |       |
|---------|--------|---|-------|
| P17-018 | MS     | 6 | 0.14  |
| P17-017 | MS     | 6 | 0.15  |
| P17-060 | MS     | 6 | 0.12  |
| P17-058 | MS     | 6 | 0.03  |
| P17-044 | MS     | 6 | 0.04  |
| P17-043 | MS     | 6 | 0.02  |
| P17-046 | MS     | 6 |       |
| P17-018 | MS     | 7 | 0.01  |
| P17-017 | MS     | 7 | 0.02  |
| P17-060 | MS     | 7 | 0.01  |
| P17-058 | MS     | 7 | 0.03  |
| P17-044 | MS     | 7 | 0.14  |
| P17-043 | MS     | 7 | 0.01  |
| P17-046 | MS     | 7 |       |
| P16-367 | MS+HGF | 1 | 0.015 |
| P16-444 | MS+HGF | 1 | 0.01  |
| P16-552 | MS+HGF | 1 | 0.011 |
| P16-553 | MS+HGF | 1 | 0.06  |
| P16-551 | MS+HGF | 1 | 0.05  |
| P16-734 | MS+HGF | 1 | 0.01  |
| P16-733 | MS+HGF | 1 | 0.041 |
| P16-367 | MS+HGF | 2 | 16    |
| P16-444 | MS+HGF | 2 | 3.4   |
| P16-552 | MS+HGF | 2 | 4.9   |
| P16-553 | MS+HGF | 2 | 16    |
| P16-551 | MS+HGF | 2 | 4.90  |
| P16-734 | MS+HGF | 2 | 0.06  |
| P16-733 | MS+HGF | 2 | 12    |
| P16-367 | MS+HGF | 3 | 11    |
| P16-444 | MS+HGF | 3 | 6.2   |
| P16-552 | MS+HGF | 3 | 17    |
| P16-553 | MS+HGF | 3 | 20    |
| P16-551 | MS+HGF | 3 | 13    |
| P16-734 | MS+HGF | 3 | 5     |
| P16-733 | MS+HGF | 3 | 16    |
| P16-367 | MS+HGF | 4 | 10    |
| P16-444 | MS+HGF | 4 | 5.6   |
| P16-552 | MS+HGF | 4 | 11    |
| P16-553 | MS+HGF | 4 | 18    |
| P16-551 | MS+HGF | 4 | 17    |
| P16-734 | MS+HGF | 4 | 5.4   |
| P16-733 | MS+HGF | 4 | 20    |
| P16-367 | MS+HGF | 5 | 7.6   |
| P16-444 | MS+HGF | 5 | 3.5   |
| P16-552 | MS+HGF | 5 | 11    |

|         |        |   |       |
|---------|--------|---|-------|
| P16-553 | MS+HGF | 5 | 11    |
| P16-551 | MS+HGF | 5 | 8     |
| P16-734 | MS+HGF | 5 | 3.7   |
| P16-733 | MS+HGF | 5 | 9.1   |
| P16-367 | MS+HGF | 6 | 0.024 |
| P16-444 | MS+HGF | 6 | 0.025 |
| P16-552 | MS+HGF | 6 | 0.33  |
| P16-553 | MS+HGF | 6 | 0.45  |
| P16-551 | MS+HGF | 6 | 0.10  |
| P16-734 | MS+HGF | 6 | 0.07  |
| P16-733 | MS+HGF | 6 | 0.21  |
| P16-367 | MS+HGF | 7 | 0.01  |
| P16-444 | MS+HGF | 7 | 0.01  |
| P16-552 | MS+HGF | 7 | 0.01  |
| P16-553 | MS+HGF | 7 | 0.01  |
| P16-551 | MS+HGF | 7 | 0.01  |
| P16-734 | MS+HGF | 7 | 0.01  |
| P16-733 | MS+HGF | 7 | 0.012 |

**Figure S1: TnI individual data.**

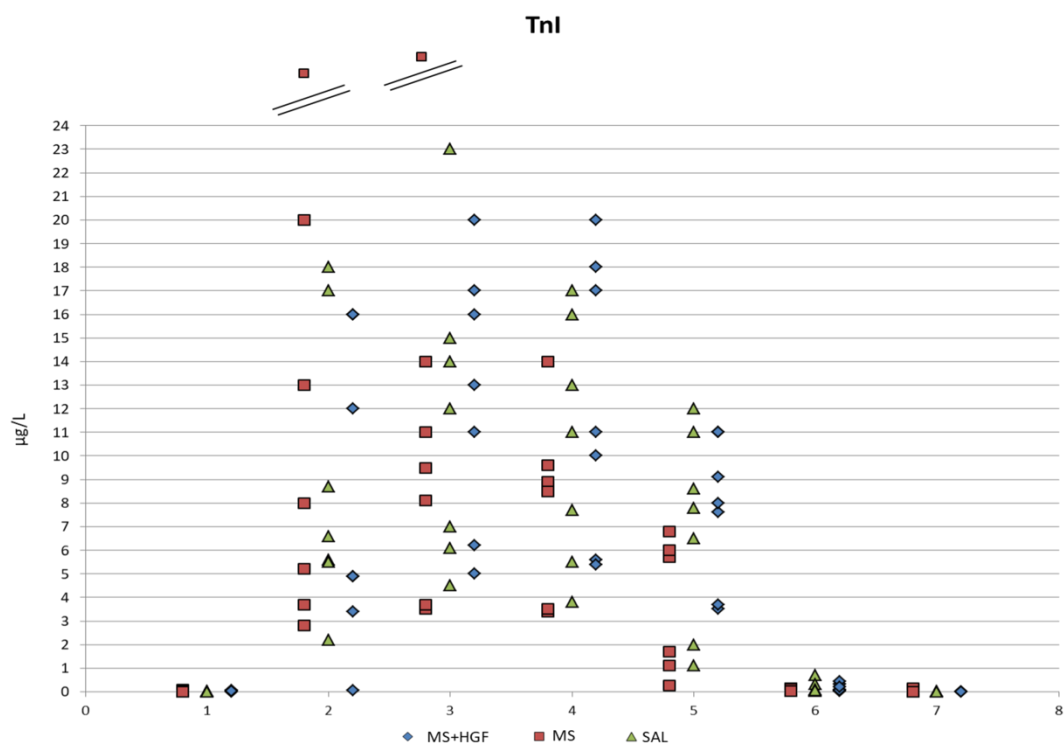

The individual data of TnI of each group have been presented in the graphic along the seven time point of the study. The outside data belong to two animals of the MS group on T2 and T3. The TnI value on T2 is 34 µg/l, on T3 is 41 µg/l. Time point 1 represents data pre- myocardial

infarction model; Time 2: Postmyocardial infarction; Time 3: pre-treatment; Time 4: Post-treatment; Time 5: 24 h post-treatment; Time 6: 1week post-treatment; Time 7: end of study.

**Table S2: Individual cytokines values.** The table presents the individual data of each cytokine along the study time points

| Animal | Time | Group  | IFN-g (pg/mL) | IL-12(pg/mL) | IL-8(pg/mL) |
|--------|------|--------|---------------|--------------|-------------|
| 1      | 3    | MS+HGF | 0.74          | 353.65       | 24.71       |
|        | 4    | MS+HGF | 0.74          | 261.6        | 25.62       |
|        | 5    | MS+HGF | 0.95          | 404.47       | 68.38       |
|        | 6    | MS+HGF | 0.64          | 523.1        | 206.68      |
|        | 7    | MS+HGF | 1.05          | 162.62       | 51.37       |
| 2      | 3    | MS+HGF | 0.49          | 95.51        | 17.04       |
|        | 4    | MS+HGF | 0.74          | 58.37        | 18.22       |
|        | 5    | MS+HGF | 0.64          | 126          | 71.8        |
|        | 6    | MS+HGF | 0.44          | 136.12       | 192.09      |
|        | 7    | MS+HGF | 0.53          | 196.56       | 420.04      |
| 3      | 3    | MS+HGF | 1.94          | 566.26       | 49.69       |
|        | 4    | MS+HGF | 0.64          | 410.66       | 45.91       |
|        | 5    | MS+HGF | 0.64          | 98.06        | 79.77       |
|        | 6    | MS+HGF | 0.84          | 323.85       | 131.56      |
|        | 7    | MS+HGF | 1.27          | 191.54       | 89.61       |
| 4      | 3    | MS+HGF | 0.84          | 385.89       | 26.29       |
|        | 4    | MS+HGF | 1.44          | 261.6        | 9.17        |
|        | 5    | MS+HGF | 0.53          | 100.61       | 36.04       |
|        | 6    | MS+HGF | 3.12          | 736.18       | 126.5       |
|        | 7    | MS+HGF | 0.44          | 211.6        | 41.65       |
| 5      | 3    | MS+HGF | 0.64          | 158.84       | 11.69       |

|    |   |        |      |         |        |
|----|---|--------|------|---------|--------|
|    | 4 | MS+HGF | 0.64 | 371.02  | 17.04  |
|    | 5 | MS+HGF | 0.44 | 482.37  | 43.36  |
|    | 6 | MS+HGF | 0.53 | 755.86  | 145.66 |
|    | 7 | MS+HGF | 1.05 | 191.54  | 39.94  |
| 6  | 3 | SAL    | 0.64 | 353.65  | 69.59  |
|    | 4 | SAL    | 0.64 | 338.76  | 36.48  |
|    | 5 | SAL    | 0.53 | 305.2   | 46.75  |
|    | 6 | SAL    | 0.74 | 503.36  | 335.35 |
|    | 7 | SAL    | 0.84 | 151.28  | 46.75  |
| 7  | 3 | SAL    | 0.53 | 700.5   | 14.88  |
|    | 4 | SAL    | 1.05 | 691.88  | 16.32  |
|    | 5 | SAL    | 0.53 | 593.38  | 13.42  |
|    | 6 | SAL    | 1.6  | 2453.03 | 88.43  |
|    | 7 | SAL    | 3.18 | 4808.78 | 94.86  |
| 8  | 3 | SAL    | 0.44 | 118.39  | 42.93  |
|    | 4 | SAL    | 3.6  | 161.36  | 113.86 |
|    | 5 | SAL    | 0.44 | 58.37   | 25.39  |
|    | 6 | SAL    | 0.95 | 472.48  | 423.82 |
|    | 7 | SAL    | 0.53 | 141.18  | 29.21  |
| 9  | 3 | SAL    | 0.74 | 201.58  | 21.72  |
|    | 4 | SAL    | 1.88 | 211.6   | 8.66   |
|    | 5 | SAL    | 1.55 | 302.71  | 39.07  |
|    | 6 | SAL    | 1.49 | 437.88  | 69.99  |
|    | 7 | SAL    | 0.95 | 552.7   | 85.49  |
| 10 | 3 | SAL    | 0.64 | 236.63  | 30.33  |
|    | 4 | SAL    | 0.74 | 100.61  | 5.48   |
|    | 5 | SAL    | 1.6  | 403.23  | 164.7  |

|    |   |     |      |         |        |
|----|---|-----|------|---------|--------|
|    | 6 | SAL | 0.95 | 359.86  | 95.44  |
|    | 7 | SAL | 0.84 | 166.4   | 146.03 |
| 11 | 3 | MS  | 0.64 | 960.05  | 67.57  |
|    | 4 | MS  | 0.44 | 661.11  | 31.43  |
|    | 5 | MS  | 0.84 | 913.3   | 145.66 |
|    | 6 | MS  | 0.53 | 860.41  | 253.58 |
|    | 7 | MS  | 0.84 | 1363.08 | 150.81 |
| 12 | 3 | MS  | 0.44 | 161.36  | 22.19  |
|    | 4 | MS  | 0.74 | 163.88  | 21.96  |
|    | 5 | MS  | 0.44 | 123.46  | 62.71  |
|    | 6 | MS  | 0.84 | 316.39  | 324.08 |
|    | 7 | MS  | 0.58 | 507.06  | 229.91 |
| 13 | 3 | MS  | 1    | 92.96   | 23.34  |
|    | 4 | MS  | 0.58 | 49.33   | 152.28 |
|    | 5 | MS  | 0.53 | 9.99    | 24.25  |
|    | 6 | MS  | 0.53 | 98.06   | 332.33 |
|    | 7 | MS  | 0.79 | 181.49  | 39.07  |
| 14 | 3 | MS  | 2.35 | 348.69  | 79.18  |
|    | 4 | MS  | 2.35 | 271.58  | 33.42  |
|    | 5 | MS  | 0.84 | 855.49  | 257.73 |
|    | 6 | MS  | 0.53 | 566.26  | 406.05 |
|    | 7 | MS  | 5.48 | 311.42  | 48.01  |
| 15 | 3 | MS  | 0.44 | 455.18  | 56.35  |
|    | 4 | MS  | 0.58 | 282.8   | 23.79  |
|    | 5 | MS  | 1.66 | 937.9   | 415.27 |
|    | 6 | MS  | 0.84 | 711.57  | 261.53 |
|    | 7 | MS  | 0.53 | 861.64  | 99.89  |

**Figure S2: Individual data of IFN-g.**

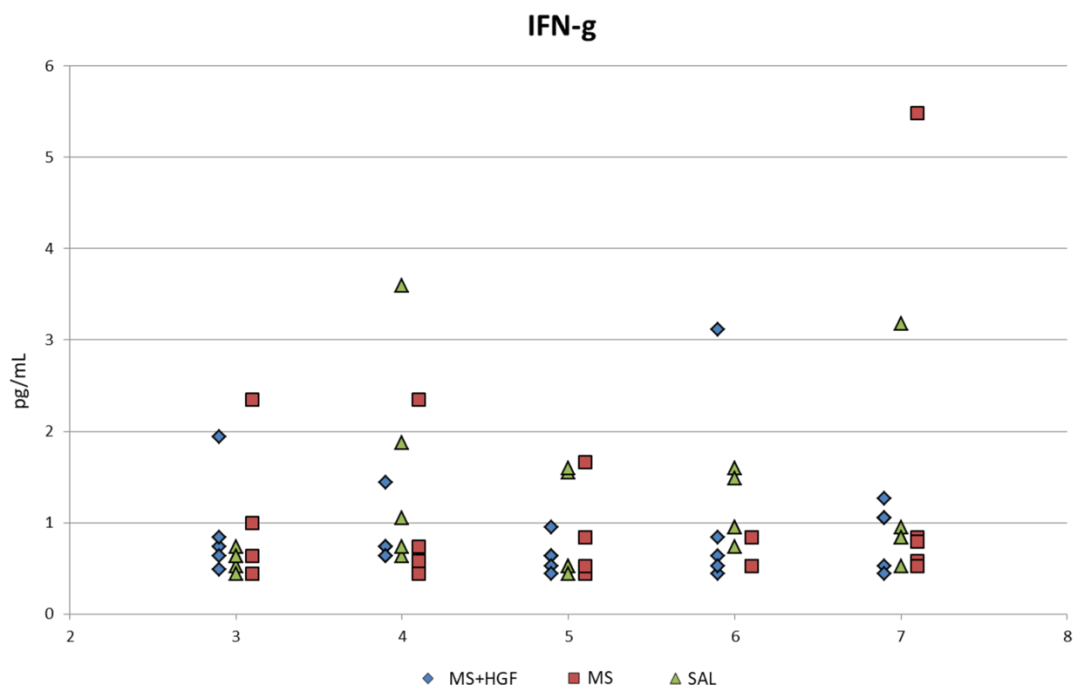

The graphic presents the individual data of IFN-g of each study group along the study time points.

**Figure S3: Individual data of IL-12.**

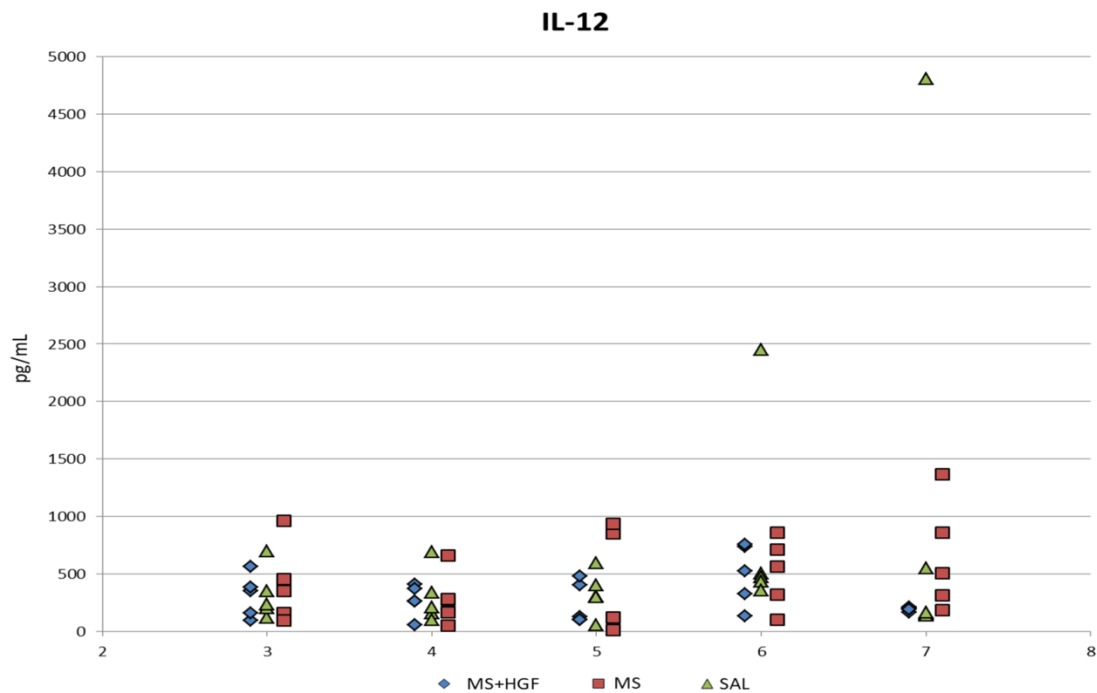

The graphic presents the individual data of IL-12 of each study group along the study time points.



**Figure S4: Individual data of IL-8.**

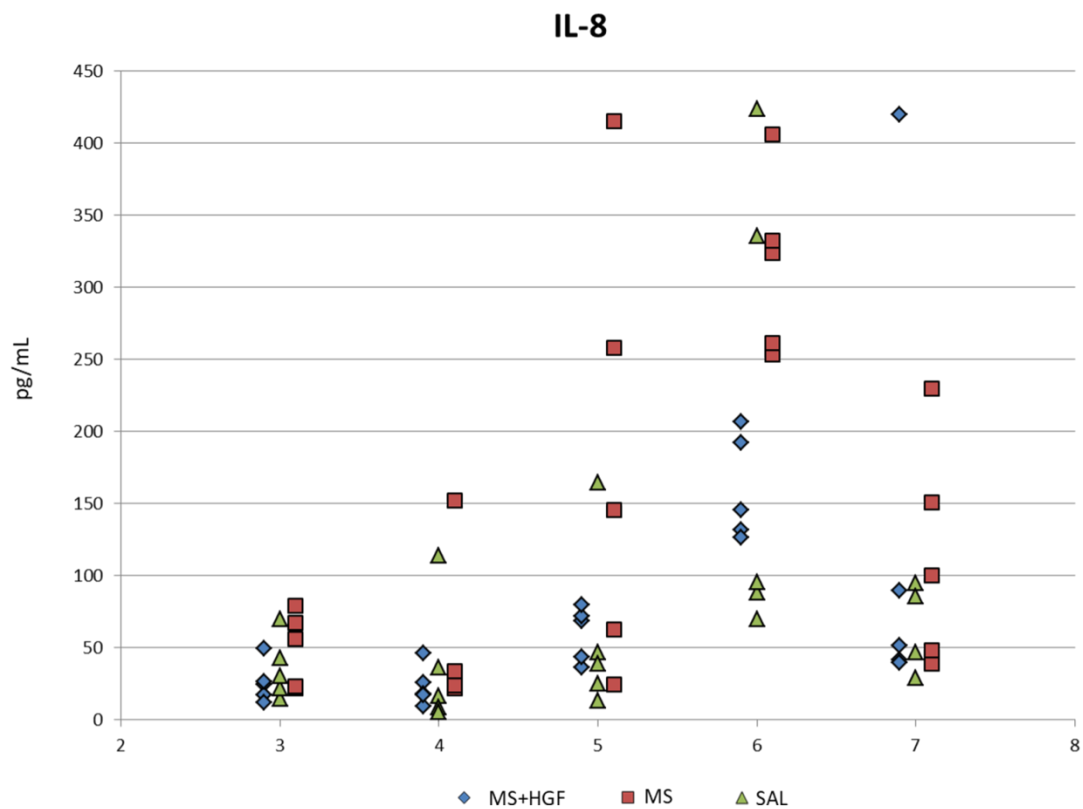

The graphic presents the individual data of IL-8 of each study group along the study time points.

**Figure S5: Individual data of %MI**

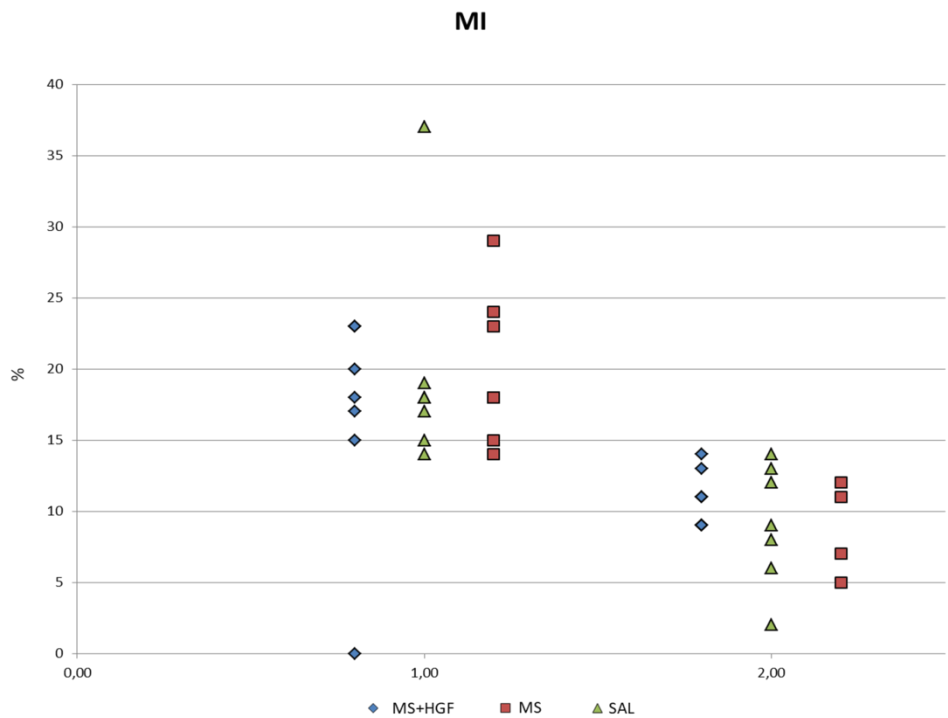

The graphic presents the individual data of % of myocardial infarction measured by Magnetic Resonance of each study group along the study time points.

**Figure S6: Individual data of %EF**

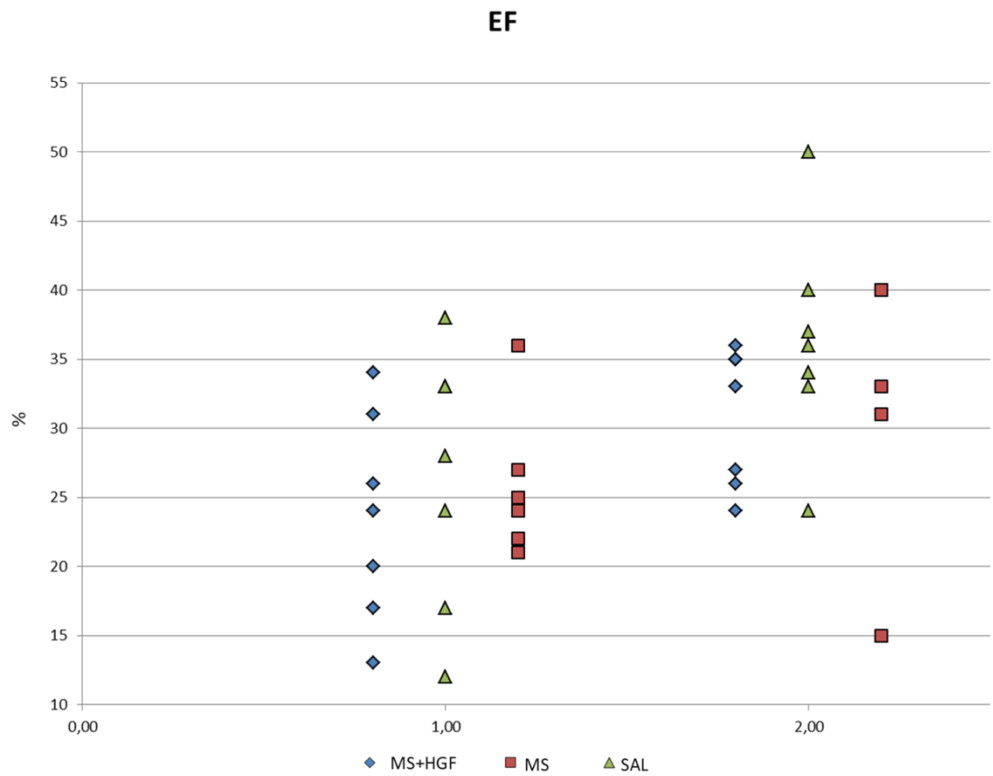

The graphic presents the individual data of % of ejection fraction measured by Magnetic Resonance of each study group along the study time points
